# Supplementary material
Source: PubMed Central journal article supplement (PMC8983483)
Supplement: mmc1.pdf [file mmc1.pdf]

**TABLE 1: Summary of clinical findings of case reports reviewed.**

| Article No.                           | 1 [10]                                                                  | 2 [11]                                                         | 3 [12]                                              | 4 [13]                                                                | 5(a) [14]                                               | 5(b) [14]                                                       | 6 [15]                                                                   | 7 [16]                            | 8 [17]                                                      | 9 [18]                              | 10 [19]              | 11 [20]                                                    | 12(a) [21]                                                          | 12(b) [21]                                                                       | 12(c) [21]                                                   | 13 [22]               | 14 [23]                             |
|---------------------------------------|-------------------------------------------------------------------------|----------------------------------------------------------------|-----------------------------------------------------|-----------------------------------------------------------------------|---------------------------------------------------------|-----------------------------------------------------------------|--------------------------------------------------------------------------|-----------------------------------|-------------------------------------------------------------|-------------------------------------|----------------------|------------------------------------------------------------|---------------------------------------------------------------------|----------------------------------------------------------------------------------|--------------------------------------------------------------|-----------------------|-------------------------------------|
| Study type                            | CR                                                                      | CR                                                             | CR                                                  | CR                                                                    | CS                                                      | CS                                                              | CR                                                                       | CR                                | CR                                                          | CR                                  | CR                   | CR                                                         | CS                                                                  | CS                                                                               | CS                                                           | CR                    | CR                                  |
| Origin                                | UK                                                                      | UK                                                             | US                                                  | UK                                                                    | US                                                      | US                                                              | UK                                                                       | US                                | UK                                                          | US                                  | UK                   | UK                                                         | US                                                                  | US                                                                               | US                                                           | US                    | UK                                  |
| Age                                   | 42                                                                      | 36                                                             | 57                                                  | 40                                                                    | 49                                                      | 34                                                              | 50                                                                       | 36                                | 55                                                          | 58                                  | 63                   | 43                                                         | 30                                                                  | 34                                                                               | 33                                                           | 53                    | NM                                  |
| Gender                                | M                                                                       | F                                                              | M                                                   | M                                                                     | M                                                       | F                                                               | M                                                                        | F                                 | F                                                           | M                                   | M                    | M                                                          | M                                                                   | F                                                                                | M                                                            | M                     | M                                   |
| “COVID - Psychosis” relation in title | Yes                                                                     | No                                                             | Yes                                                 | Yes                                                                   | Yes                                                     | Yes                                                             | Yes                                                                      | Yes                               | Yes                                                         | Yes                                 | Yes                  | Yes                                                        | Yes                                                                 | Yes                                                                              | Yes                                                          | No                    | No                                  |
| Chief complaints                      | Megalomaniac delusions<br>Insomnia<br>mood swings,<br>violent behaviour | Disorganised<br>aggressive and irritable behaviour<br>insomnia | Delusions<br>Hallucinations<br>disorganised thought | Delusions of death<br>visual hallucinations<br>disorganised behaviour | Disorganised thought and behaviour<br>Confusion<br>gran | Ideas of persecution<br>disorganised behaviour<br>talkativeness | Auditory, visual and tactile hallucinations<br>panic attack<br>self-harm | Persecutory delusions<br>insomnia | Paranoid delusions<br>disorganised and aggressive behaviour | Confusion<br>disorganised behaviour | Nihilistic delusions | Grandiose delusions<br>Irritability<br>elevate self esteem | Bizarre behaviour<br>Anxiety<br>auditory hallucinations<br>suicidal | Disorganised behaviour<br>Inattentive<br>Suspicious<br>bizarre somatic delusions | Auditory hallucination<br>paranoid and persecutory delusions | Persecutory delusions | Grandiose delusions<br>irritability |

|           |                                                      |                                            |                                                              |                                                         |                                                  |                                        |                                                                                              |                                                                                             |                                                            |                                                         |                                                            |                                                                    |                    |                    |                    |                         |                 |
|-----------|------------------------------------------------------|--------------------------------------------|--------------------------------------------------------------|---------------------------------------------------------|--------------------------------------------------|----------------------------------------|----------------------------------------------------------------------------------------------|---------------------------------------------------------------------------------------------|------------------------------------------------------------|---------------------------------------------------------|------------------------------------------------------------|--------------------------------------------------------------------|--------------------|--------------------|--------------------|-------------------------|-----------------|
|           |                                                      |                                            |                                                              |                                                         | delusions                                        |                                        | disorganised behaviour                                                                       |                                                                                             | hallucinations                                             |                                                         |                                                            |                                                                    | ideations          |                    |                    |                         |                 |
|           |                                                      |                                            |                                                              |                                                         | insomnia                                         |                                        | insomnia                                                                                     |                                                                                             | disorientation                                             |                                                         |                                                            |                                                                    |                    |                    |                    |                         |                 |
|           |                                                      |                                            |                                                              |                                                         |                                                  |                                        |                                                                                              |                                                                                             | confusion                                                  |                                                         |                                                            |                                                                    |                    |                    |                    |                         |                 |
| Diagnosis | Relapse of severe psychosis associated with COVID 19 | Psychotic relapse from Covid 19 quarantine | Late onset psychosis as a presentation of COVID 19 infection | New onset brief psychosis related to COVID 19 infection | New onset psychosis following COVID 19 infection | New onset psychosis following COVID 19 | New onset psychosis due to COVID 19; Acute and transient psychotic disorder; Brief psychotic | COVID 19 associated brief psychotic disorder; brief psychotic disorder with stressor; COVID | Persistent psychotic symptoms following COVID-19 infection | COVID 19 presenting as psychosis; psychosis unspecified | Psychotic Disorder to Another Medical Condition (COVID 19) | substance/medication induced manic episode with psychotic features | COVID 19 Psychosis | COVID 19 Psychosis | COVID 19 Psychosis | Brief Psychotic Episode | Acute Psychosis |

|                               |                       |                        |                                      |                        |                                |             |                                                      |                                     |                              |                        |                                              |                                          |            |                                    |            |             |            |
|-------------------------------|-----------------------|------------------------|--------------------------------------|------------------------|--------------------------------|-------------|------------------------------------------------------|-------------------------------------|------------------------------|------------------------|----------------------------------------------|------------------------------------------|------------|------------------------------------|------------|-------------|------------|
|                               |                       |                        |                                      |                        |                                |             | disorder with stressor                               | D 19 sequelae                       |                              |                        |                                              |                                          |            |                                    |            |             |            |
| Diagnostic criteria           | NM                    | NM                     | NM                                   | NM                     | NM                             | NM          | AMERICAN PSYCHIATRIC ASSOCIATION ET AL. 2013; ICD 10 | NM                                  | NM                           | NM                     | AMERICAN PSYCHIATRIC ASSOCIATION ET AL. 2013 | NM                                       | NM         | NM                                 | NM         | NM          | NM         |
| Duration - Psychotic symptoms | 8 days                | NM                     | NM                                   | 7 days                 | 7 days                         | NM          | NM                                                   | 7 days                              | 52 days                      | NM                     | NM                                           | NM                                       | NM         | NM                                 | 4 days     | NM          | NM         |
| Treatment- Psychosis          | Olanzapine, lorazepam | Clozapine, risperidone | Haloperidol, lorazepam, aripiprazole | Aripiprazole, diazepam | Haloperidol, olanzapine, queti | Risperidone | Sertraline – switched to risperidone, BZDs           | Clonazepam, olanzapine-cross tapere | Lorazepam, haloperidol-cross | Haloperidol, lorazepam | Risperidone                                  | Valproic acid, paliperidone, olanzapine, | Quetiapine | Fluoxetine, melatonin, clonazepam, | Quetiapine | Haloperidol | Olanzapine |



|                                                                                          |        |                                                                      |                                   |                                                                                               |                                                                                               |                                                                           |                                                                 |                            |                               |                                                        |                                             |                                                                                                                                                      |           |           |           |            |                                                                      |
|------------------------------------------------------------------------------------------|--------|----------------------------------------------------------------------|-----------------------------------|-----------------------------------------------------------------------------------------------|-----------------------------------------------------------------------------------------------|---------------------------------------------------------------------------|-----------------------------------------------------------------|----------------------------|-------------------------------|--------------------------------------------------------|---------------------------------------------|------------------------------------------------------------------------------------------------------------------------------------------------------|-----------|-----------|-----------|------------|----------------------------------------------------------------------|
|                                                                                          |        |                                                                      |                                   |                                                                                               | erlip<br>idaemia                                                                              |                                                                           |                                                                 |                            | (reso<br>lved)                |                                                        |                                             |                                                                                                                                                      |           |           |           |            |                                                                      |
| Recovery                                                                                 | NM     | Not<br>recovered                                                     | Recovered<br>in 6<br>weeks        | Maintained<br>on<br>Aripip<br>razole                                                          | Recovered<br>in<br>2.5<br>weeks                                                               | NM                                                                        | Partial<br>recovery<br>(residual<br>anxiety<br>and<br>insomnia) | Recovered<br>in 2<br>weeks | Recovered<br>in<br>52<br>days | Recovered<br>in 1<br>week                              | NM                                          | Recovered                                                                                                                                            | Recovered | Recovered | Recovered | Recovered  | Recovered                                                            |
| Duration B/w<br>COVID<br>positive<br>status<br>and<br>onset of<br>psychosis {RT-<br>PCR} | 9 days | COVID<br>confirmed<br>&<br>symptoms 7<br>days<br>before<br>psychosis | “Early<br>in his<br>ED<br>course” | COVID<br>not<br>confirmed<br>(2<br>weeks<br>between<br>COVID<br>symptoms<br>and<br>psychosis) | COVID<br>not<br>confirmed<br>(2<br>weeks<br>between<br>COVID<br>symptoms<br>and<br>psychosis) | 2.5<br>weeks<br>before<br>testing<br>positive<br>for<br>SARS<br>CoV-<br>2 | NM                                                              | 4 days                     | 3<br>days                     | COVID<br>confirmed 3<br>days<br>following<br>psychosis | NM<br>(“during<br>hospital<br>isation”<br>) | NM<br>(psychosis<br>onset-8<br>days<br>post<br>admission<br>for<br>infection<br>and 4<br>days<br>after<br>start of<br>corticosteroid<br>therapy<br>) | NM        | NM        | NM        | 5<br>weeks | COVID<br>confirmed<br>&<br>symptoms<br>6 days<br>before<br>psychosis |

|                            |            |    |     |     |              |     |                                         |     |             |                    |                                            |    |                                |                              |               |    |    |
|----------------------------|------------|----|-----|-----|--------------|-----|-----------------------------------------|-----|-------------|--------------------|--------------------------------------------|----|--------------------------------|------------------------------|---------------|----|----|
| Severity of infection      | NM         | NM | NM  | NM  | NM           | NM  | NM                                      | NM  | NM          | NM                 | Elevated D-dimer, CT angio-thromboembolism | NM | Elevated Acute Phase Reactants | WBC decreased; CRP increased | CRP increased | NM | NM |
| Treatment- COVID infection | Antibiotic | NM | NM  | nil | azithromycin | nil | C-PAP, antibiotics, acyclovir, steroids | nil | IVF, oxygen | hydroxychloroquine | NM                                         | NM | nil                            | NM                           | NM            | NM | NM |
| Delirium                   | NM         | NM | nil | nil | Yes          | nil | NM                                      | nil | Yes         | NM                 | Yes                                        | NM | nil                            | nil                          | NM            | NM | NM |

KEY FOR TABLE

1. CR- Case report
2. CS- Case series
3. HTN- Hypertension
4. NM- Not mentioned
5. T2DM- Type 2 Diabetes Mellitus
6. M- Male
7. F- Female
8. CAD- Coronary Artery Disease
9. UK- United Kingdom
10. US- United States

11. IVF- Intravenous Fluids
